# Supplementary material for: Effect of Selenium Nanoparticle Size on IL-6 Detection Sensitivity in a Lateral Flow Device
Source: PubMed Central journal article supplement (PMC9996617; doi:10.1021/acsomega.2c07297), 2023-02-23
Supplement: ao2c07297_si_001.pdf [file ao2c07297_si_001.pdf]

# *Effect of Selenium Nanoparticle Size on IL-6 Detection Sensitivity in a Lateral Flow Device*

<sup>3,4</sup>Zoe Bradley\*, <sup>1,2</sup>Patrick A. Coleman, <sup>1</sup>Melissa A. Courtney, <sup>4</sup>Sam Fishlock, <sup>1</sup>Joseph McGrath, <sup>6</sup>Therese Uniacke-Lowe, <sup>4,5</sup>Nikhil Bhalla, <sup>4</sup>James A. McLaughlin, <sup>1</sup>John Hogan, <sup>1</sup>John P. Hanrahan, <sup>3</sup>Ke-Ting Yan and <sup>3</sup>Philip McKee.

<sup>1</sup> Glantreo Ltd., Environmental Research Institute, Cork, T23 XE10, Ireland.

<sup>2</sup> Department of Chemistry, College of SEFS, University College Cork, Kane Building, Cork T12 YN60, Ireland.

<sup>3</sup> Biopanda Reagents Ltd., Unit 14 Carrowreagh Business Park, Carrowreagh Road, Belfast, BT16 1QQ, United Kingdom.

<sup>4</sup> Nanotechnology and Integrated Bioengineering Centre, School of Engineering, University of Ulster, Belfast, BT15 1ED, United Kingdom.

<sup>5</sup> Healthcare Technology Hub, School of Engineering, University of Ulster, Belfast, BT15 1ED, United Kingdom.

<sup>6</sup> Department of Chemistry, School of Food and Nutritional Sciences, University College Cork Leve 2 Food Science Building, Cork T12 TP07, Ireland.

\* Corresponding Author: [z.woods@ulster.ac.uk](mailto:z.woods@ulster.ac.uk)

**Presented within this supporting information document are the following sections:**

[1] Supplementary Figures S1 – S6

[2] Supplementary Table S1

## 1. Supplementary Figures

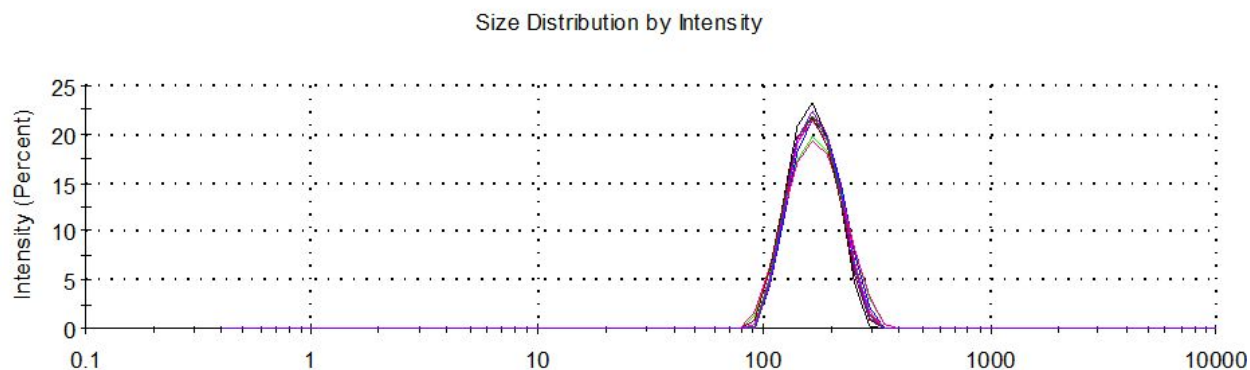

**Figure S1:** Size distribution plot of the nine recorded DLS measurements performed on the 150 nm SeNPs. The average diameter from the above size distribution plot is presented in Table 1 in the main document.

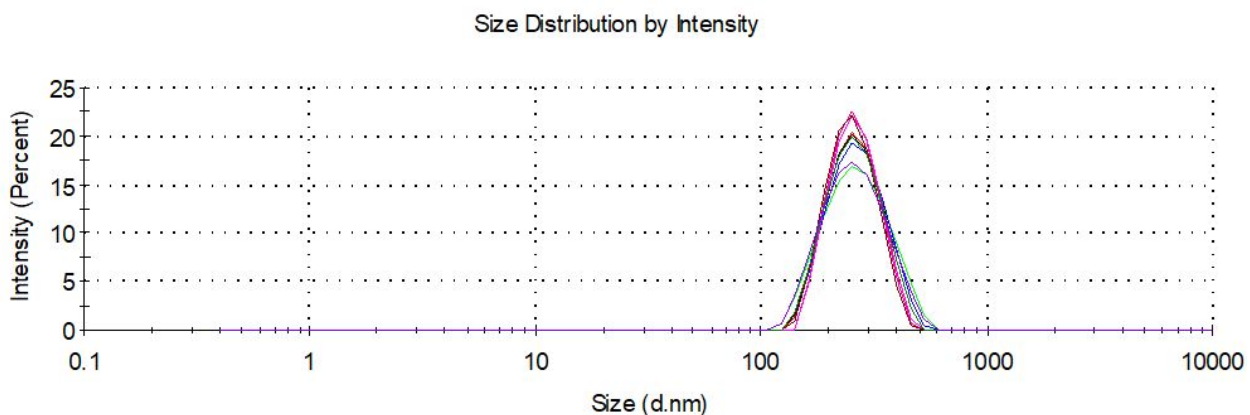

**Figure S2:** Size distribution plot of the nine recorded DLS measurements performed on the 200 nm SeNPs. The average diameter from the above size distribution plot is presented in Table 1 in the main document.

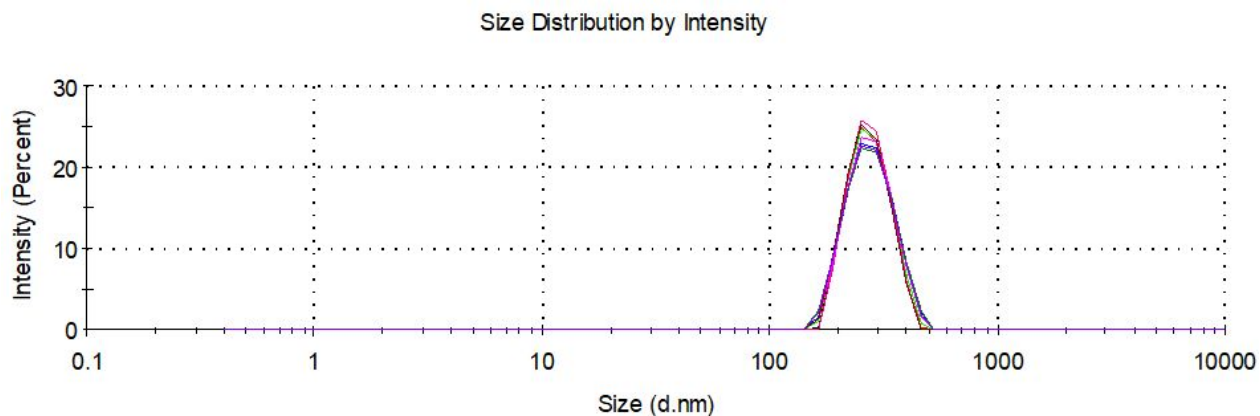

**Figure S3:** Size distribution plot of the nine recorded DLS measurements performed on the 250 nm SeNPs. The average diameter from the above size distribution plot is presented in Table 1 in the main document.

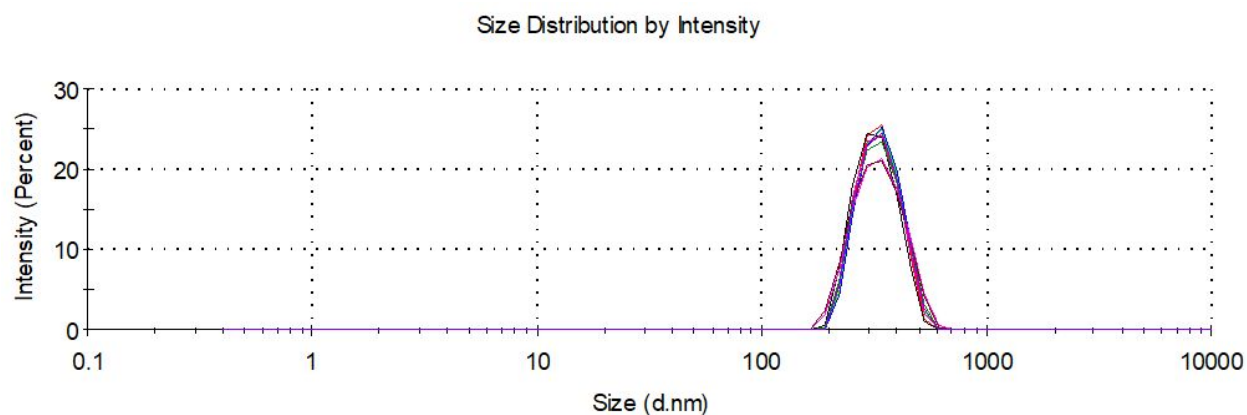

**Figure S4:** Size distribution plot of the nine recorded DLS measurements performed on the 310 nm SeNPs. The average diameter from the above size distribution plot is presented in Table 1 in the main document.

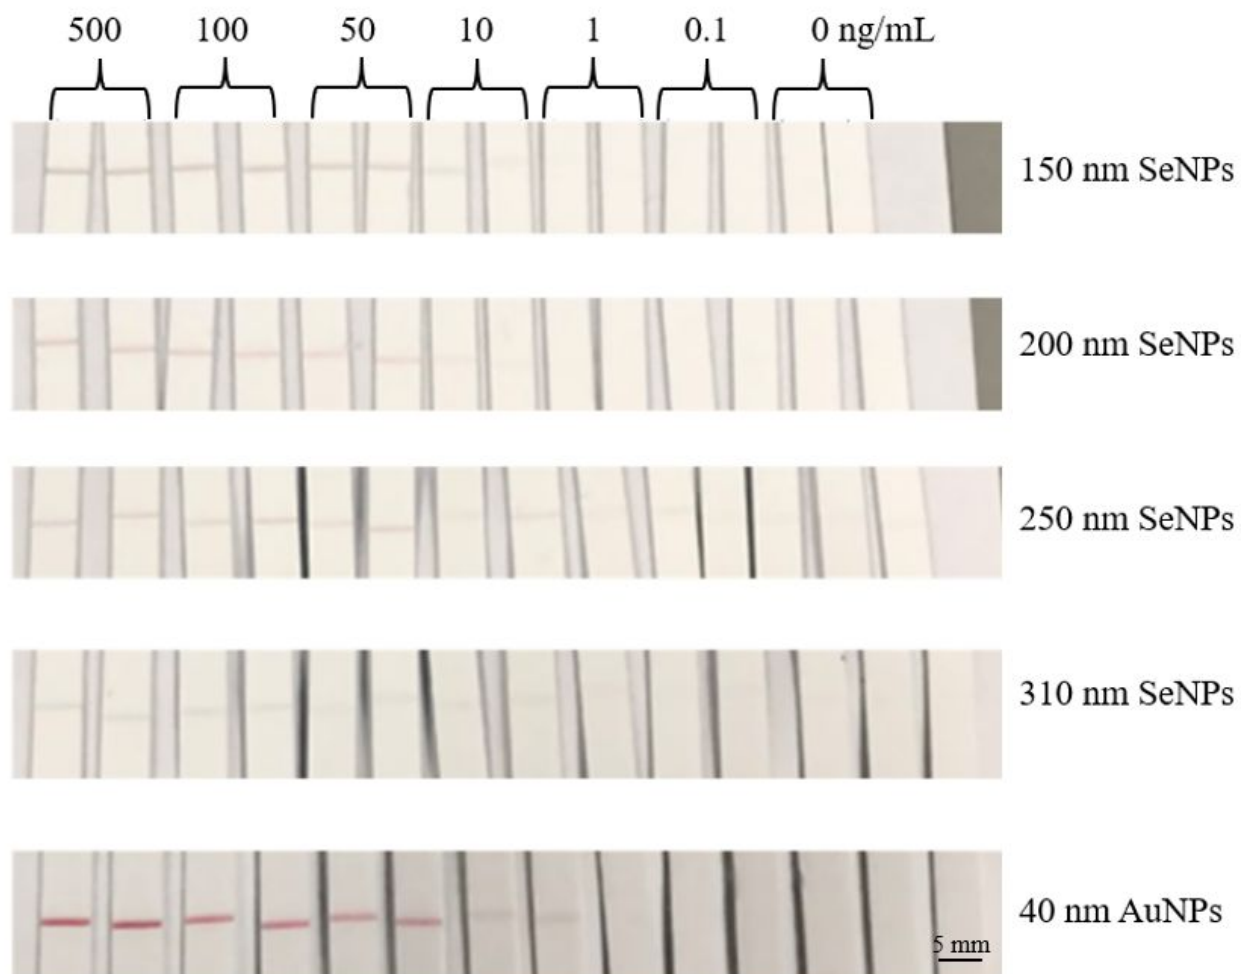

**Figure S5:** Direct images of the SeNPs and AuNPs-based LFDs used in the investigation of IL-6 sensitivity. **(Left to right)** LFDs were subjected to successively lower concentrations of IL-6. **(Top to bottom)** LFDs which employed successively larger SeNPs, and finally AuNPs. All LFDs were analyzed in duplicate to ensure reproducibility.

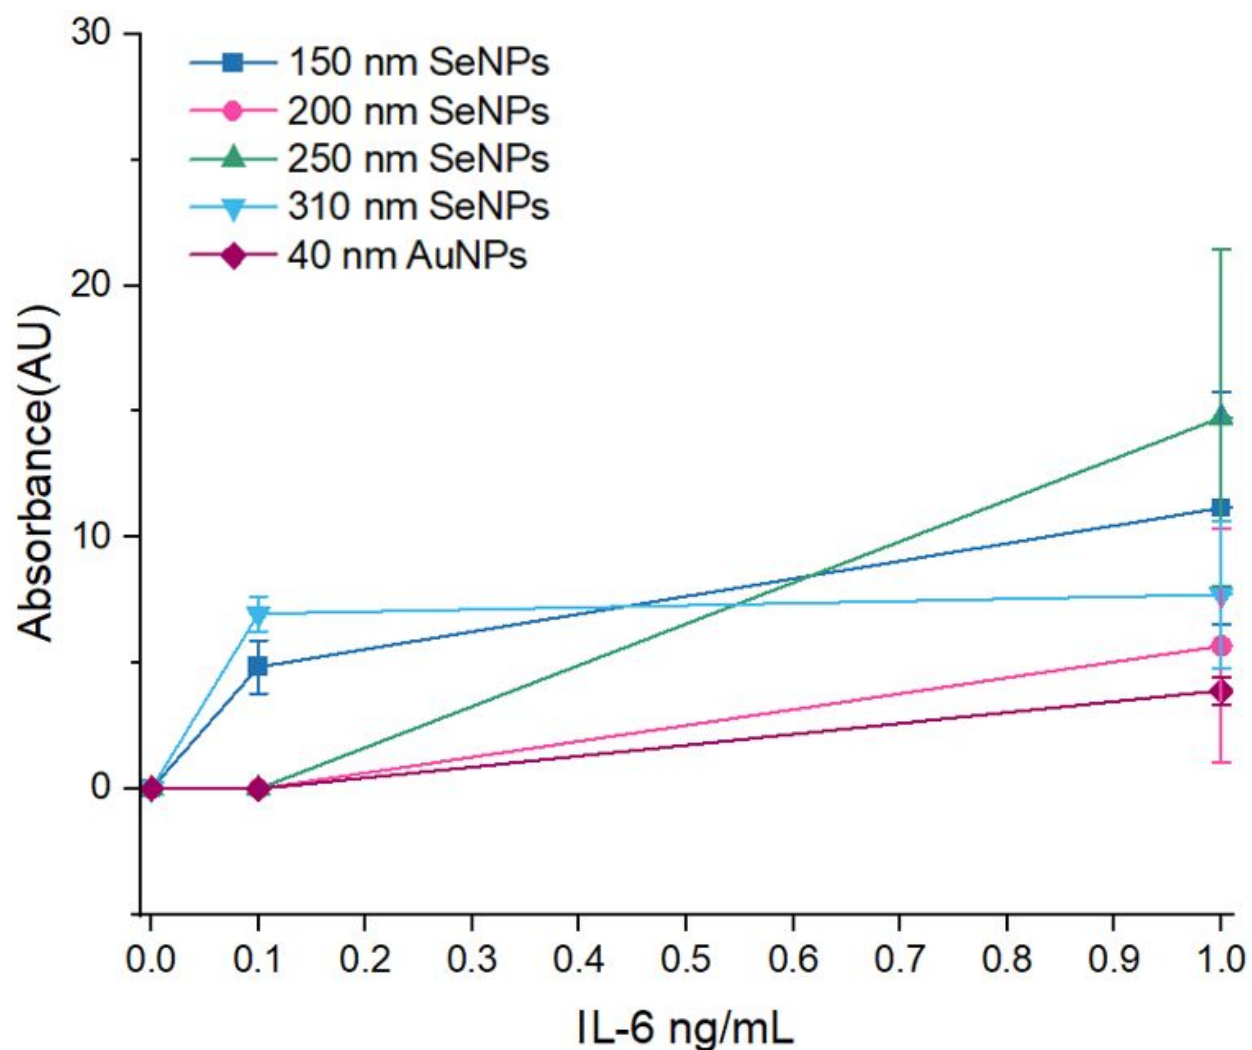

**Figure S6:** Absorbance vs IL-6 concentration plot for each SeNPs and AuNPs-based LFD. The above plot illustrates the LOD of each label. Specifically, 0.1 ng/ml for the 150 nm and 310 nm sized SeNPs labels, and 1 ng/ml for the 200 nm and 250 nm sized SeNPs labels as well as the 40 nm AuNPs label.

## 2. Supplementary Table

**Table S1:** Sensitivity values run in duplicate for the 150 nm, 200 nm, 250 nm, 310 nm SeNPs and 40 nm AuNPs-based LFDs in the detection of IL-6. Values were recorded using Image J analysis software.

| <b>IL-6<br/>(ng/mL)</b> | <b>150 nm<br/>SeNPs</b> |     | <b>200 nm<br/>SeNPs</b> |    | <b>250 nm<br/>SeNPs</b> |    | <b>310 nm<br/>SeNPs</b> |    | <b>40 nm<br/>AuNPs</b> |     |
|-------------------------|-------------------------|-----|-------------------------|----|-------------------------|----|-------------------------|----|------------------------|-----|
| <b>500</b>              | 122                     | 121 | 102                     | 98 | 47                      | 58 | 43                      | 42 | 166                    | 146 |
| <b>100</b>              | 110                     | 104 | 68                      | 76 | 36                      | 42 | 27                      | 32 | 128                    | 123 |
| <b>50</b>               | 88                      | 79  | 48                      | 56 | 23                      | 37 | 19                      | 23 | 104                    | 93  |
| <b>10</b>               | 41                      | 27  | 25                      | 11 | 16                      | 17 | 12                      | 10 | 32                     | 19  |
| <b>1</b>                | 14                      | 8   | 9                       | 2  | 10                      | 20 | 10                      | 6  | 4                      | 4   |
| <b>0.1</b>              | 6                       | 4   | 0                       | 0  | 0                       | 0  | 7                       | 6  | 0                      | 0   |
| <b>0</b>                | 0                       | 0   | 0                       | 0  | 0                       | 0  | 0                       | 0  | 0                      | 0   |
